# Supplementary material for: Strong Purifying Selection in Transmission of Mammalian Mitochondrial DNA
Source: PubMed Central journal article supplement (PMC2214808; doi:10.1371/journal.pbio.0060010), 2008-01-29

## N2 animals

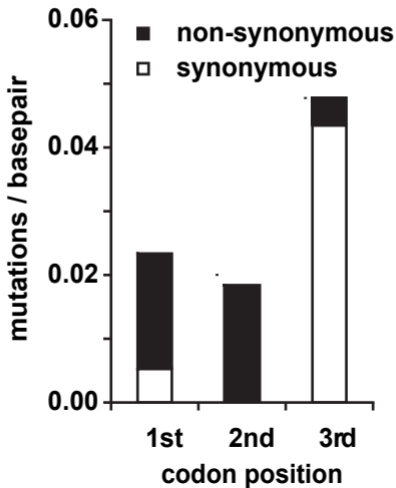

Supplement: pbio.0060010.sg001.pdf [file pbio.0060010.sg001.pdf]
